# Supplementary material for: A Real-World Comparative Analysis of Atezolizumab Plus Bevacizumab and Transarterial Chemoembolization Plus Radiotherapy in Hepatocellular Carcinoma Patients with Portal Vein Tumor Thrombosis
Source: MDPI journal article supplement (doi:10.3390/cancers15174423), 2023-09-04
Supplement: s1 [file s1]

## Supplementary Materials

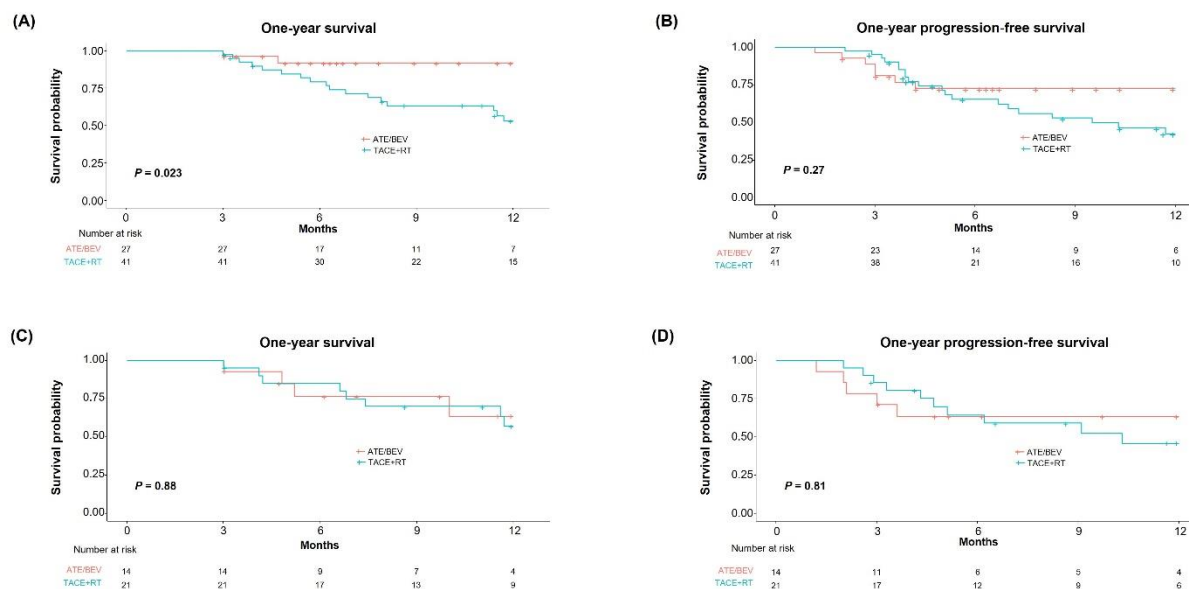

**Figure S1.** One-year survival and progression-free survival in patients with (A,B) multiple intrahepatic HCC, and (C,D) unilobar intrahepatic HCC without VP4 PVTT. HCC, hepatocellular carcinoma; VP4 PVTT, major portal vein tumor thrombus.
